# Supplementary material for: Cryo-EM structure of an activated VIP1 receptor-G protein complex revealed by a NanoBiT tethering strategy
Source: PubMed Central journal article supplement (PMC7431577; doi:10.1038/s41467-020-17933-8), 2020-08-17
Supplement: 41467_2020_17933_MOESM1_ESM.pdf [file 41467_2020_17933_MOESM1_ESM.pdf]

## **Supplementary Information**

### **Cryo-EM structure of an activated VIP1 receptor-G protein complex revealed by a NanoBiT tethering strategy**

Duan et al.

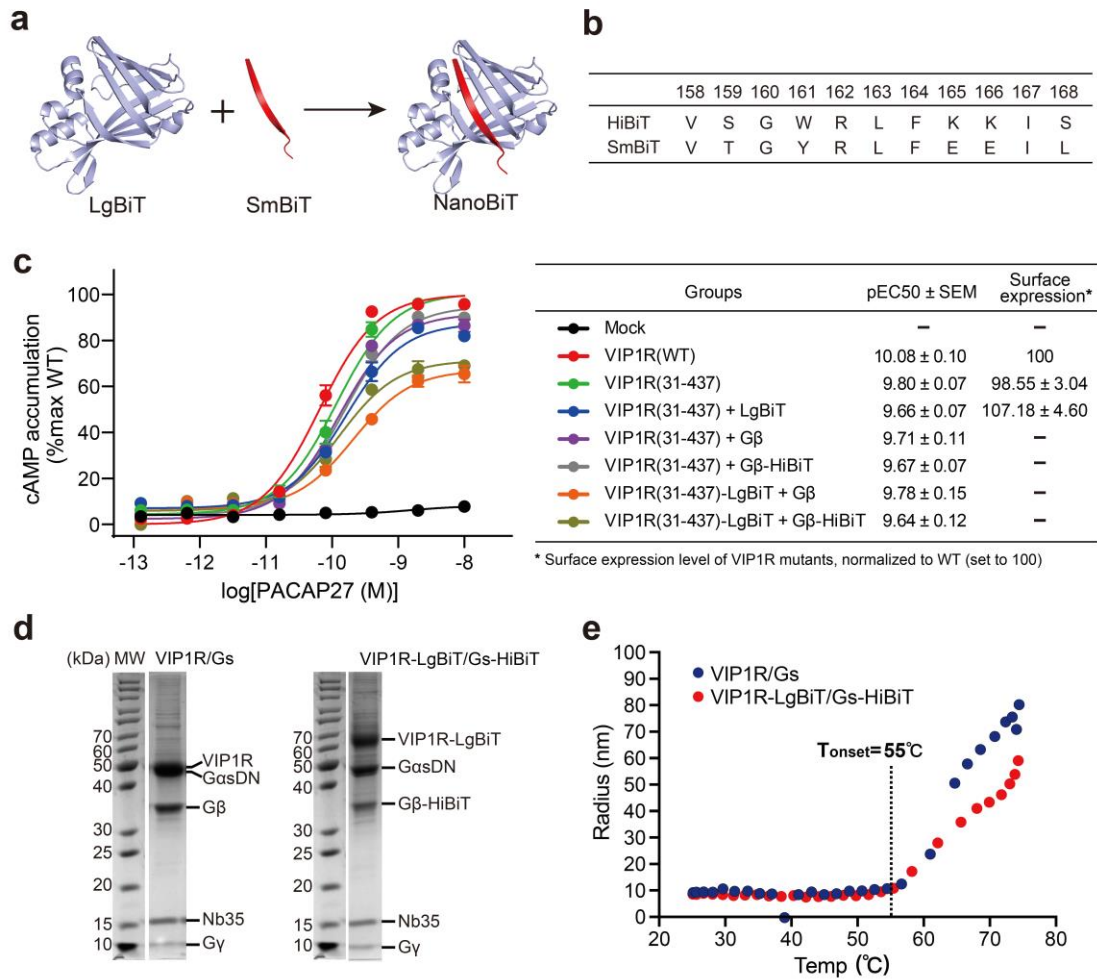

### Supplementary Figure 1. Characterization of VIP1R and its Gs complex

**a**, Schematic diagram of the NanoBiT system. **b**, Sequence comparison of HiBiT and SmBiT. **c**, PACAP27 concentration-cAMP response curves in cells expressing wild-type VIP1R, VIP1R(31-437), and combinations of LgBiT-fused VIP1R(31-437) and HiBiT-fused Gβ subunit. pEC50s are listed in the table. The surface expression of VIP1R mutants were assessed by flow cytometry. The data were normalized to WT, which was set to 100. **d**, SDS-PAGE analysis of truncated VIP1R (31-437)-Gs and VIP1R (31-437)-LgBiT-Gs-HiBiT complexes. **e**, Thermostability analysis of VIP1R (31-437)-Gs and VIP1R (31-437)-LgBiT-Gs-HiBiT complexes by dynamic light scattering (DLS). The hydrodynamic radii of the corresponding VIP1R complexes were monitored as a function of temperature. Source data are provided as a Source Data file.

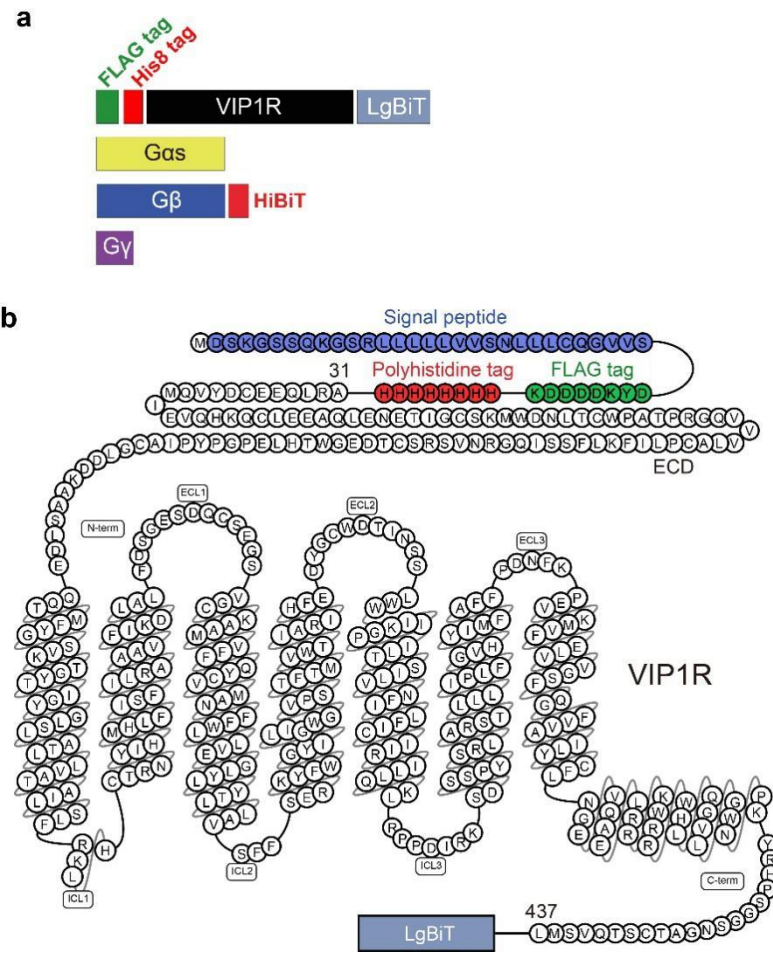

**Supplementary Figure 2. Schematic diagrams of human VIP1R-Gs complex constructs**  
**a**, Schematic diagram of human VIP1R-Gs complex constructs used in this study. **b**, Snake-plot diagram of the VIP1R-LgBiT construct.

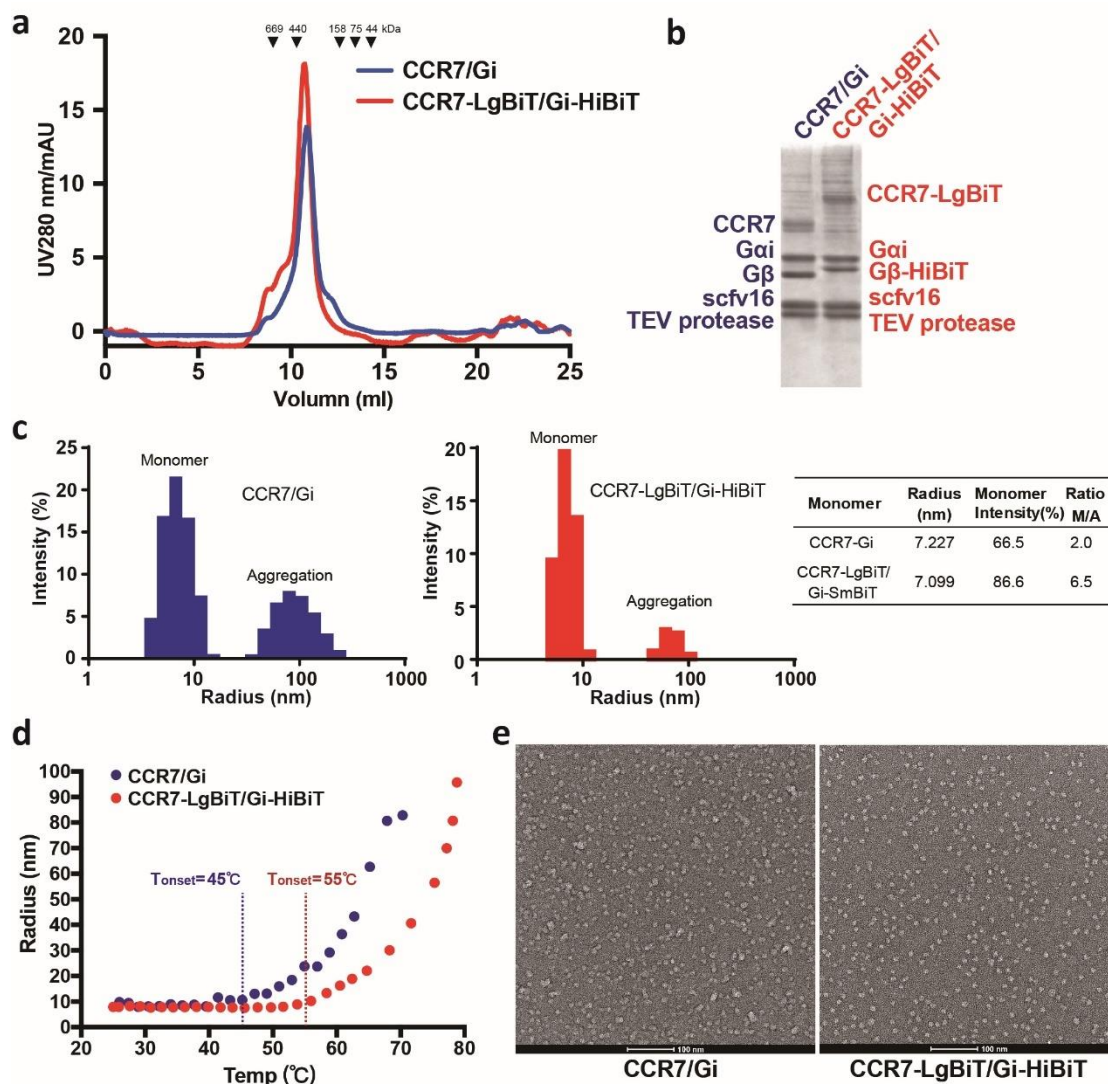

### Supplementary Figure 3. Characterization of a CCR7-LgBiT/Gs-HiBiT complex

**a**, Size-exclusion chromatography elution profiles of the CCR7-Gs and CCR7-LgBiT/Gs-HiBiT complexes. **b**, SDS-PAGE analysis of the eluted complexes. **c**, Dynamic light scattering (DLS) size distribution histogram of CCR7/Gi and CCR7-LgBiT/Gi-HiBiT complexes. Values of Radius, % intensity of monomer, and Ratio of monomer/aggregation (M/A) are listed. **d**, Thermostability analysis of CCR7/Gi and CCR7-LgBiT/Gi-HiBiT complexes by DLS. The hydrodynamic radii of corresponding CCR7-Gi complexes were monitored as a function of temperature. NanoBiT-tethered complex exhibited a significantly enhanced thermostability with its  $T_{\text{onset}}$  value increased from 45 °C to 55 °C. **e**, Representative negative staining images of the corresponding complexes. The scale bar is 100 nm. Source data are provided as a Source Data file.

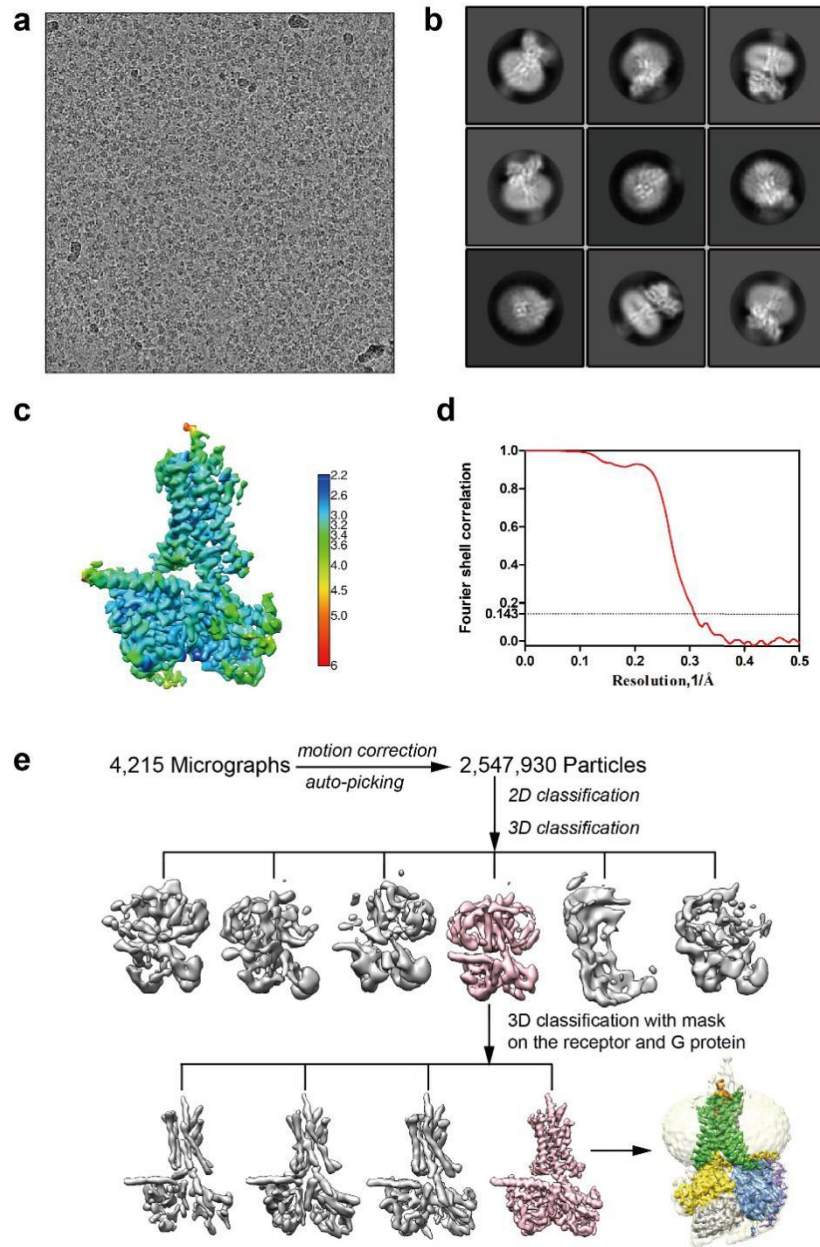

**Supplementary Figure 4. Single particle cryo-EM analysis of the PACAP27-VIP1R-Gs complex**

**a**, Representative cryo-EM micrograph of the PACAP27-VIP1R-Gs complex. The scale bar is 30 nm. **b**, Representative 2D class averages displaying distinct secondary structural features from different views. The scale bar is 5 nm. **c**, Cryo-EM map of the PACAP27-VIP1R-Gs complex colored by local resolutions from 2.2 Å (blue) to 6 Å (red). **d**, The “Gold-standard” Fourier shell correlation curve indicates that the overall resolution of the electron density map of the complex is 3.2 Å. **e**, Flowchart of cryo-EM data analysis.

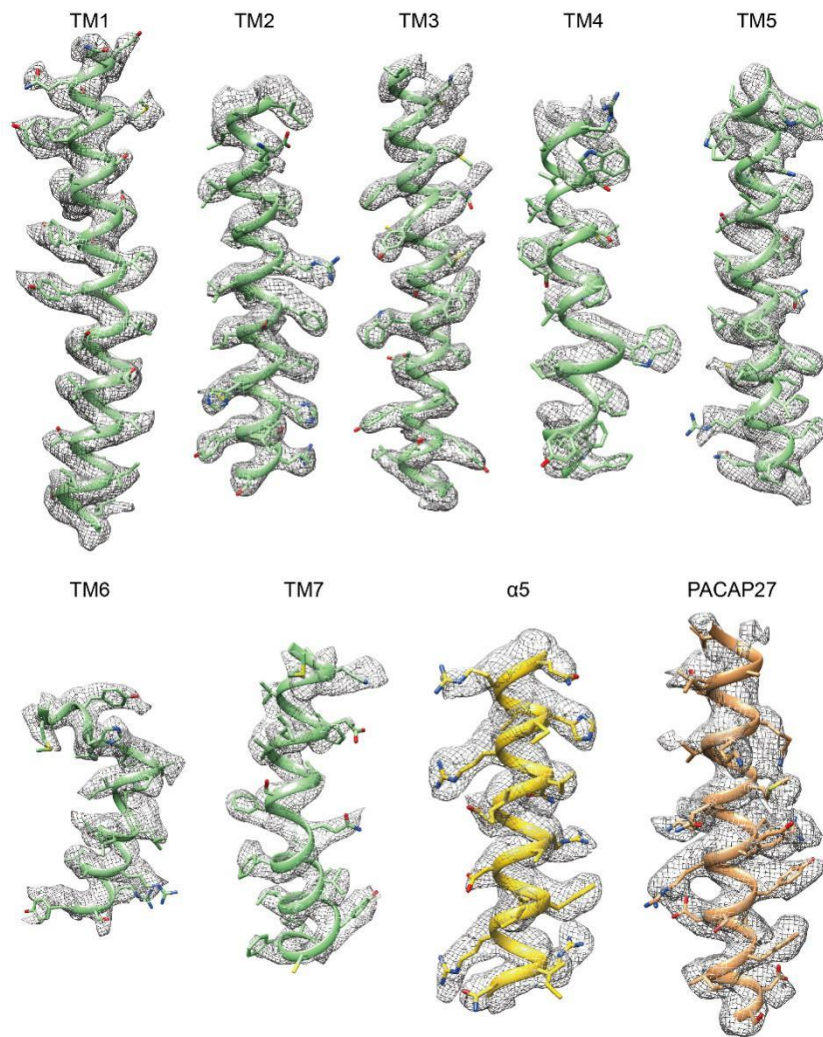

**Supplementary Figure 5. Cryo-EM density map and the model of the PACAP27-VIP1R-Gs complex**

The regions of the cryo-EM density map with all transmembrane helices, PACAP27 and  $\alpha 5$  helix of the G $\alpha$ s Ras-like domain are shown.

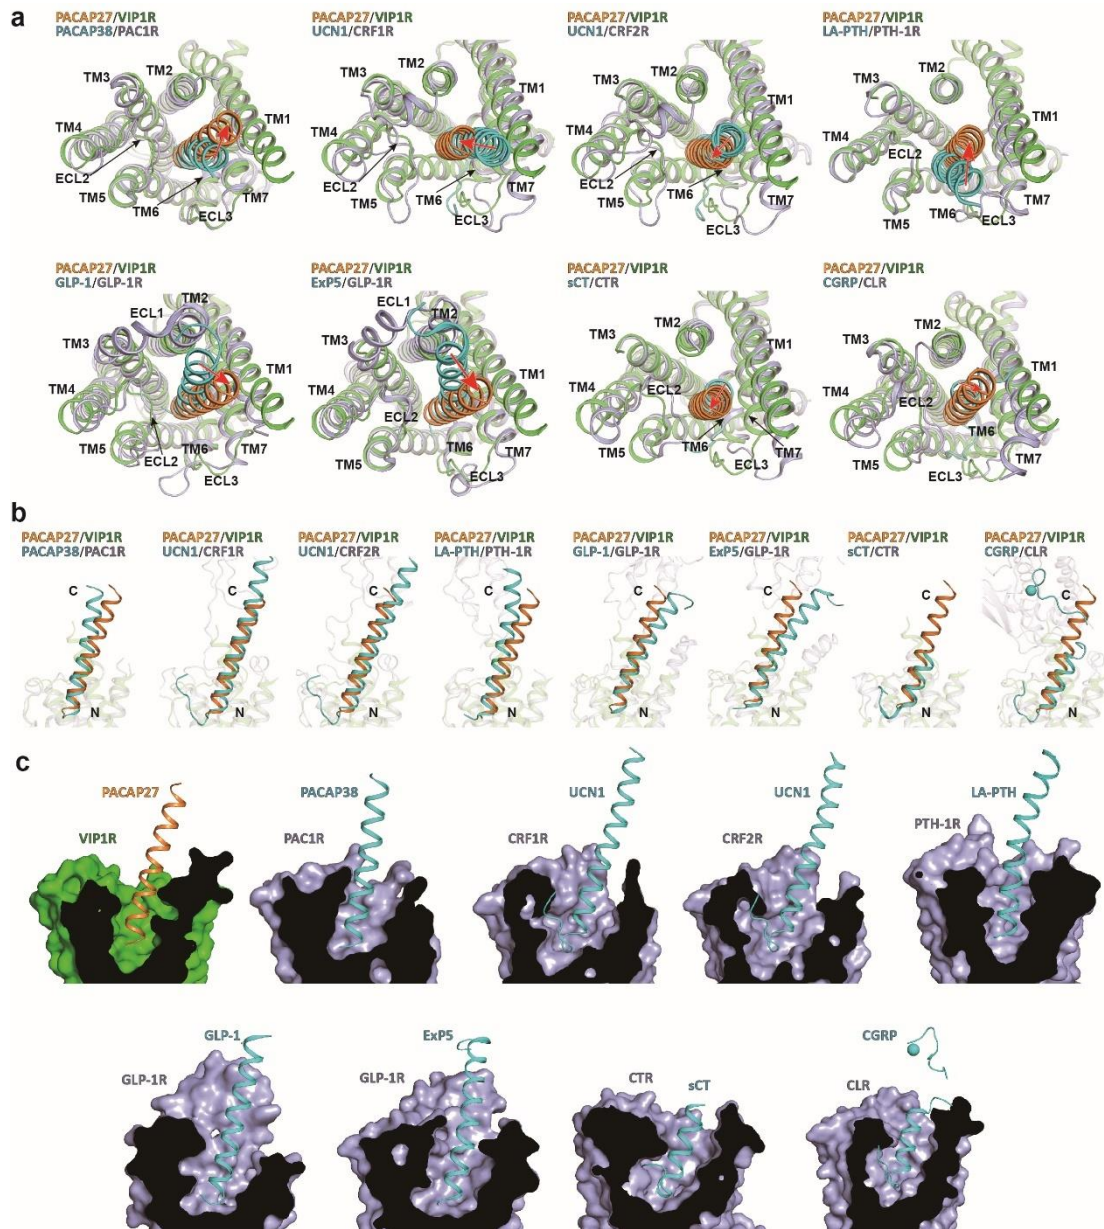

**Supplementary Figure 6. Structure comparison of the VIP1R ligand binding pocket with those of other class B GPCRs solved to date**

**a,b,** Comparison of PACAP27 (orange) with the peptide ligands (light blue) of other class B GPCRs. **a,** The top views. Red arrows indicate the directions of the shift of N-terminus of PACAP27. **b,** The side views. **c,** The cross-section views of the peptide ligand-binding pockets in the TM bundle of class B GPCRs. The structures are shown in the figure and their PDB codes: PACAP38-PAC1R-Gs, 6P9Y; UCN1-CRF1R-Gs, 6PB0; UCN1-CRF2R-Gs, 6PB1; LA-PTH-PTH1R-Gs, 6NBF; GLP-1-GLP-1R-Gs, 5VAI; ExP5-GLP-1R-Gs, 6B3J; sCT-CTG-Gs, 6NIY; and CGRP-CLR-Gs, 6E3Y.

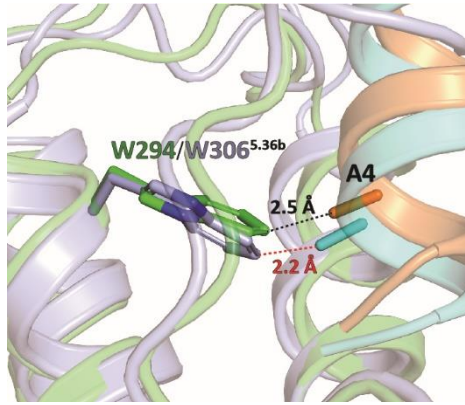

**Supplementary Figure 7. A structural model comparison for steric hindrance between G4 of VIP and W<sup>5.36b</sup> of VIP1R and PAC1R**

The mutation from glycine of PACAP at position 4 to alanine, the cognate amino acid in VIP, is generated by the SPDBV (Swiss PDB Viewer) program. The structures of PACAP27-VIP1R and PACAP38-PAC1R complex (PDB code:6P9Y) serve as models for mutations. VIP bound to VIP1R (green) is colored in orange, and VIP bound to PAC1R (lightblue) is shown in cyan. The distances between G4 of VIP and W<sup>5.36b</sup> of the receptors are labeled in black (VIP1R) and red (PAC1R). Compared to VIP1R, a more significant steric hindrance is indicated between G4 of VIP and W<sup>5.36b</sup> of PAC1R.



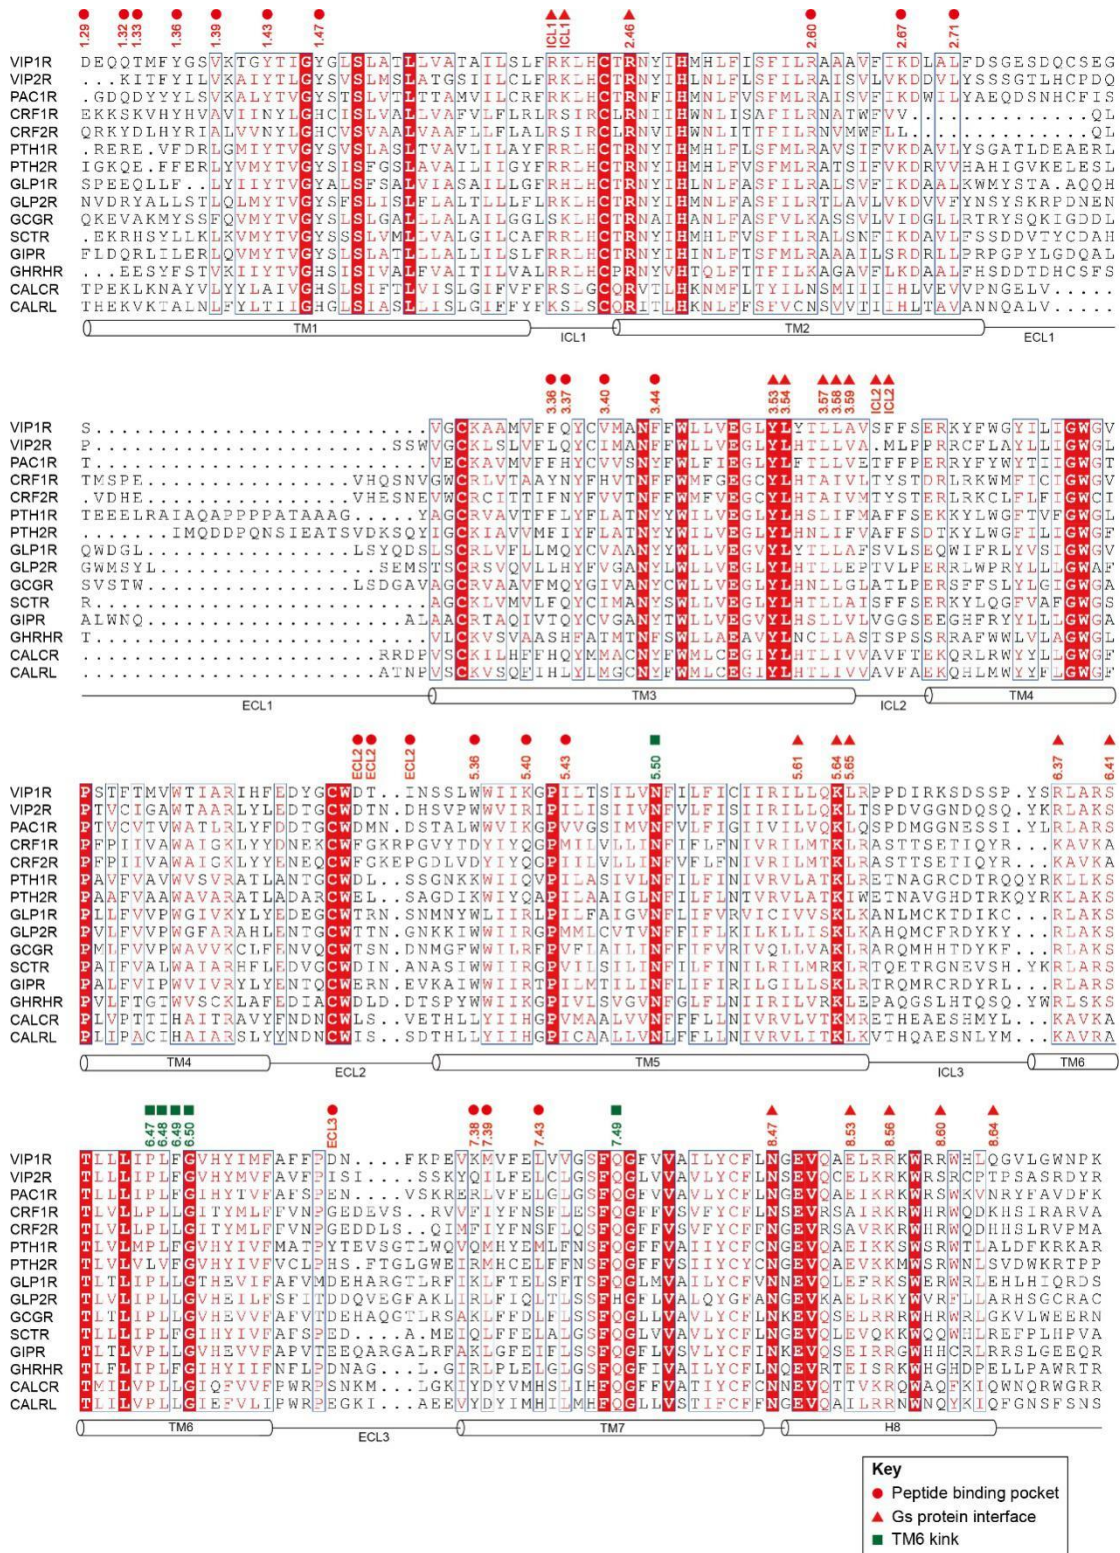

**Supplementary Figure 8. Sequence alignment of class B GPCRs excluding the ECD regions**  
 Highlighted are residues consisting of the peptide-binding pockets (red circle), the Gs coupling interface (red triangle), and the TM6 kink of VIP1R (green rectangle). Secondary structure elements are annotated underneath the sequences based on the structure of the PACAP27-VIP1R-Gs complex.

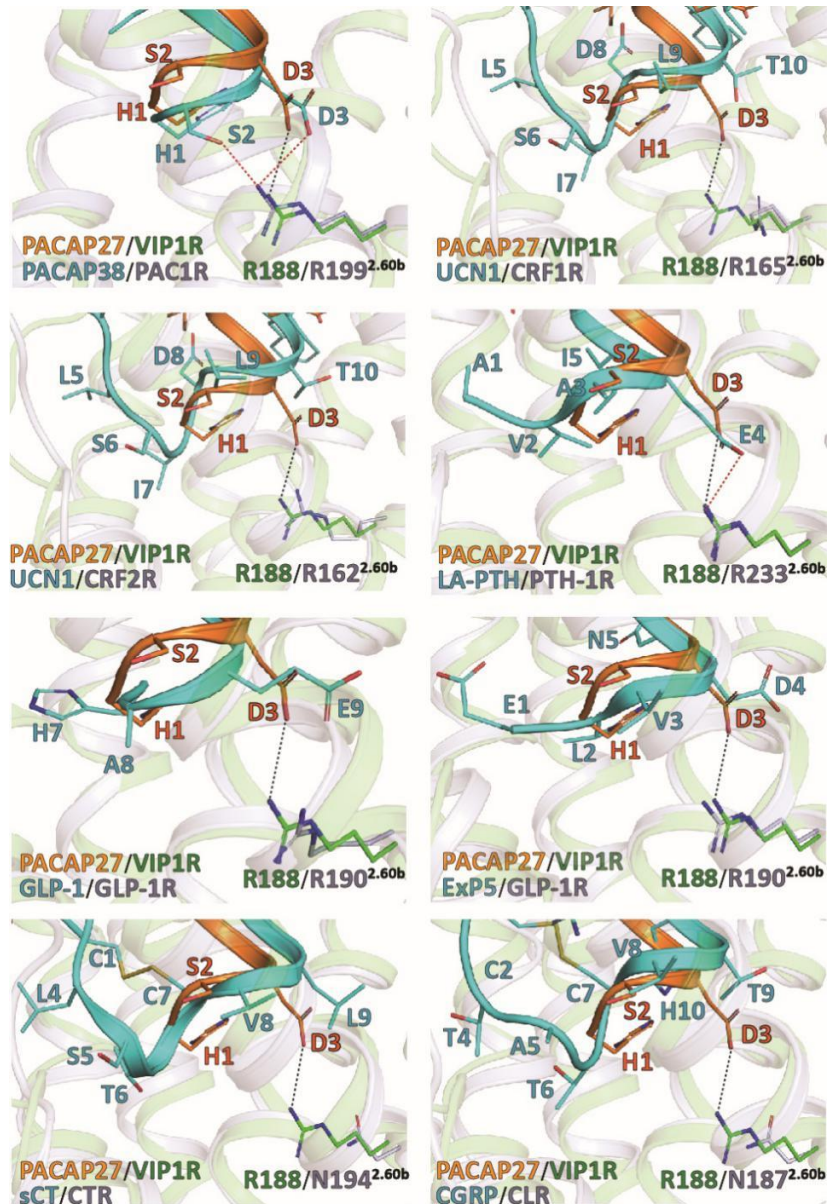

**Supplementary Figure 9. The interactions between N-terminal peptide residues and the conserved receptor residues at position 2.60b**

Comparison of the interactions between the residues at N-termini of the peptide ligands and R/N<sup>2.60b</sup> in the central polar networks of class B GPCRs. VIP1R is colored in green; PACAP27, in orange; GPCRs except for VIP1R, in light blue; and peptidic ligands binding to other GPCRs except for VIP1R, in cyan. H-bond formed between R188<sup>2.60b</sup> of VIP1R and D3 of PACAP27 is labeled as a black dotted line. The corresponding H-bonds formed between R199<sup>2.60b</sup> (PAC1R), S2 and D3 (PACAP38), as well as R233<sup>2.60b</sup> (PTH1R) and E4 (LA-PTH) are shown as red dotted lines. The PDB codes of the structures: PACAP38-PAC1R-Gs, 6P9Y; UCN1-CRF1R-Gs, 6PB0; UCN1-CRF2R-Gs, 6PB1; LA-PTH-PTH1R-Gs, 6NBF; GLP-1/GLP-1R-Gs, 5VAI; ExP5/GLP-1R-Gs, 6B3J; sCT-CTG-Gs, 6NIY; and CGRP-CLR-Gs, 6E3Y.

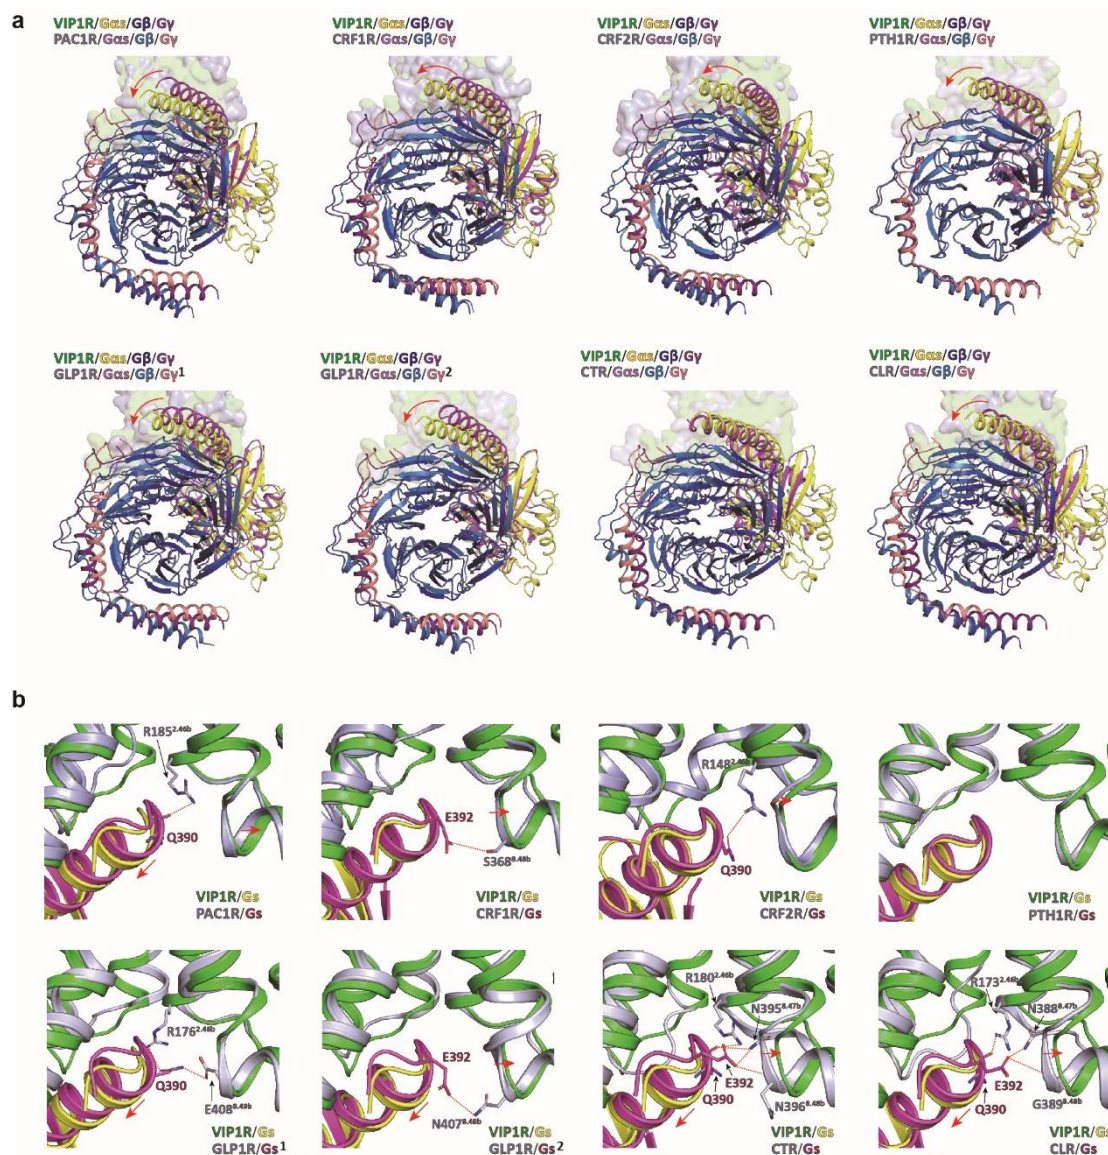

**Supplementary Figure 10. Conformational comparisons of VIP1R-Gs complex with other class B GPCR-Gs complexes solved to date**

**a**, Structural alignment of PACAP27-VIP1R-Gs complex with other class B GPCR-Gs protein complexes by superimposing their receptor TM domains reveals different orientations of the Gs protein in its complexes with different class B GPCRs. VIP1R is colored in green, G $\alpha$ s in yellow, G $\beta$  in blue, G $\gamma$  in purple for VIP1R/Gs complex; for other class B GPCR-Gs complexes, the receptor is colored in light blue, G $\alpha$ s in magenta, G $\beta$  in sky blue, and G $\gamma$  in salmon. **b**, Structural comparison of the interfaces between the receptors and  $\alpha$ 5 helix of G $\alpha$ s. The polar interactions between TM2, 3, and H7-Helix8 turn of the receptors and  $\alpha$ 5 helix of G $\alpha$ s are presented as red dotted lines. The red arrows denote the shift of H7-Helix8 turn and  $\alpha$ 5 helix of the VIP1R-Gs complex compared to other class B GPCR-Gs complexes. Superscript 1 stands for the GLP-1-GLP-1R-Gs complex, and superscript 2 refers to Exp5-GLP-1R-Gs complex. The PDB codes of the structures: PACAP38-PAC1R-Gs, 6P9Y; UCN1-CRF1R-Gs, 6PB0; UCN1-CRF2R-Gs, 6PB1; LA-PTH-PTH1R-Gs, 6NBF; GLP-1-GLP-1R-Gs, 5VAI; Exp5-GLP-1R-Gs, 6B3J; sCT-CTG-Gs, 6NIY; and CGRP-CLR-Gs, 6E3Y.

**Supplementary Table 1. Cryo-EM data collection, model refinement, and validation statistics**

| PACAP27- VPAC1R-Gs-Nb35                             | Value       |
|-----------------------------------------------------|-------------|
| <b>Data collection and processing</b>               |             |
| Magnification                                       | 49310       |
| Voltage (kV)                                        | 300         |
| Electron exposure (e <sup>-</sup> /Å <sup>2</sup> ) | 64          |
| Defocus range (μm)                                  | -1.5 ~ -2.3 |
| Pixel size (Å)                                      | 1.014       |
| Symmetry imposed                                    | C1          |
| Initial particle projections (no.)                  | 2,547,930   |
| Final particle projections (no.)                    | 131,263     |
| Map resolution (Å)                                  | 3.2         |
| FSC threshold                                       | 0.143       |
| Map resolution range (Å)                            | 2.5-6       |
| <b>Refinement</b>                                   |             |
| Initial model used (PDB code)                       | 6NBH        |
| Model resolution (Å)                                | 3.2         |
| FSC threshold                                       | 0.143       |
| Model resolution range (Å)                          | 50-3.2      |
| Map sharpening <i>B</i> factor (Å <sup>2</sup> )    | -95         |
| Model composition                                   |             |
| Non-hydrogen atoms                                  | 8683        |
| Protein residues                                    | 860         |
| Lipids                                              | 10          |
| <i>B</i> factors (Å <sup>2</sup> )                  |             |
| Protein                                             | 87.8        |
| Lipids                                              | 97.2        |
| R.m.s. deviations                                   |             |
| Bond lengths (Å)                                    | 0.005       |
| Bond angles (°)                                     | 1.135       |
| Validation                                          |             |
| MolProbity score                                    | 1.24        |
| Clashscore                                          | 3.85        |
| Poor rotamers (%)                                   | 0.11        |
| Ramachandran plot                                   |             |
| Favored (%)                                         | 97.7        |
| Allowed (%)                                         | 2.3         |
| Disallowed (%)                                      | 0           |

**Supplementary Table 2. The volumes of the TMD peptide-binding pockets in class B GPCRs and buried areas of the receptor-G protein interfaces**

The volumes of the receptor TMD binding pockets were calculated by Pymol and MOLE. Briefly, all the receptors were firstly prepared by adding hydrogens and optimizing atom positions. PyMOL was then used to select TMD peptide pocket based on the distance between the receptor and peptide. The pocket volumes were finally calculated by MOLE. BSA, the Buried Surface Area, calculated by Chimera. The PDB codes of the calculated structures: PACAP38-PAC1R-Gs, 6P9Y; UCN1-CRF1R-Gs, 6PB0; UCN1-CRF2R-Gs, 6PB1; LA-PTH-PTH1R-Gs, 6NBF; GLP-1-GLP-1R-Gs, 5VAI; ExP5-GLP-1R-Gs, 6B3J; sCT-CTG-Gs, 6NIY; and CGRP-CLR-Gs, 6E3Y.

| Receptor complexes | Volume ( $\text{\AA}^3$ )  | BSA ( $\text{\AA}^2$ ) |                       |                    |
|--------------------|----------------------------|------------------------|-----------------------|--------------------|
|                    | TMD peptide-binding pocket | Receptor-Gs            | Receptor-G $\alpha$ s | Receptor-G $\beta$ |
| PACAP27-VIP1R-Gs   | 3261                       | 1350.18                | 927.85                | 309.43             |
| PACAP38-PAC1R-Gs   | 3246                       | 1345.2                 | 1138.1                | 207.1              |
| UCN1-CRFR1-Gs      | 3373                       | 1422.44                | 1056                  | 366.44             |
| UCN1-CRFR2-Gs      | 3315                       | 1492.11                | 1040.7                | 451.41             |
| LA-PTH-PTH1R-Gs    | 3576                       | 1203.87                | 939.96                | 263.91             |
| GLP1-GLP1R-Gs      | 3682                       | 1473.02                | 1212.1                | 260.92             |
| ExP5-GLP1R-Gs      | 3657                       | 1156.76                | 943.68                | 213.08             |
| sCT-CTR-Gs         | 3521                       | 1318.48                | 1055.6                | 262.88             |
| CGRP-CLR-Gs        | 3523                       | 1299.69                | 1078.9                | 220.79             |

**Supplementary Table 3. Comparison of the interactions of PACAP N-terminus with VIP1R and PAC1R**

Superscripts refer to the Wootten conserved class B numbering system. Residues within 4 Å are shown. Sites of conserved residues utilized by two receptors are shadowed in gold. Sites of residues with similar hydrophobic properties are labeled in yellow. Residues in receptors forming hydrogen bonds with PACAP are highlighted in green. The PDB code of PAC1R is 6P9Y.

| PACAP | Numbering | VIP1R | PAC1R |
|-------|-----------|-------|-------|
| H1    | 3.37      | Q223  | H234  |
|       | 3.40      | V226  | V237  |
|       | 3.44      | F230  | Y241  |
|       | 5.36      | W294  | W306  |
|       | 5.40      | K298  | K310  |
|       | 5.43      | I301  | V313  |
| S2    | 2.60      |       | R199  |
|       | 3.44      |       | Y241  |
|       | 7.39      |       | L382  |
|       | 7.43      | L374  | L386  |
| D3    | 1.47      |       | Y161  |
|       | 2.60      | R188  | R199  |
|       | 2.64      |       | V203  |
|       | 3.36      | F222  | F233  |
| G4    | 7.43      | L374  | L386  |
|       | 5.36      | W294  | W306  |
| I5    | ECL2      | I289  |       |
|       | 5.36      | W294  | W306  |
|       | 7.39      | M370  | L382  |
| F6    | 1.36      | Y139  | Y150  |
|       | 1.39      | V142  | V153  |
|       | 1.43      | Y146  | Y157  |
|       | 7.39      | M370  | L382  |
|       | 7.43      | L374  | L386  |
| T7    | ECL1      |       | Y211  |
| D8    | ECL2      | I289  |       |
|       | 1.36      | Y139  | Y150  |
| S9    | 7.35      |       | K378  |
|       | 7.39      | M370  |       |
| Y10   | 1.36      | Y139  | Y150  |
|       | 1.37      |       | L151  |
|       | 2.71      | L199  |       |
| S11   | ECL1      |       | Y211  |
|       | ECL1      |       | Y211  |
|       | ECL2      | D287  | D298  |
| R12   | ECL2      |       | M299  |
|       | ECL2      |       | M299  |
|       | ECL2      |       | D301  |
| Y13   | 1.29      | D132  |       |
|       | 1.32      | Q135  |       |
|       | 1.33      | T136  |       |
|       | 1.34      |       | Y148  |
|       | 1.36      |       | Y150  |
| R14   | 2.71      | L199  |       |

**Supplementary Table 4. PACAP27-induced activation on wild type and VIP1R with site-directed mutations**

The LANCE based cAMP accumulation assay was performed to evaluate the activation of corresponding VIP1R mutants. Data represent mean pEC<sub>50</sub> (pEC<sub>50</sub> ± SEM). Experiments were performed in triplicate. \*P<0.05, \*\*P<0.01 versus WT. The surface expression of VIP1R mutants were assessed by flow cytometry, and the data were normalized to WT, which was set to 100. Source data are provided as a Source Data file.

| <b>Region</b> | <b>Construct</b>        | <b>pEC<sub>50</sub> ± SEM</b> | <b>Surface expression (%WT)</b> |
|---------------|-------------------------|-------------------------------|---------------------------------|
|               | WT                      | 10.45 ± 0.15                  | 100                             |
| TM1           | Q135 <sup>1.32b</sup> A | 10.31 ± 0.07                  | 122.99 ± 11.35                  |
|               | T136 <sup>1.33b</sup> A | 10.26 ± 0.09                  | 85.18 ± 10.38                   |
|               | Y139 <sup>1.36b</sup> A | 9.51 ± 0.05**                 | 55.24 ± 9.23                    |
|               | V142 <sup>1.39b</sup> A | 10.23 ± 0.08                  | 95.09 ± 4.17                    |
|               | Y146 <sup>1.43b</sup> A | 9.27 ± 0.12**                 | 82.83 ± 16.38                   |
| TM2           | R188 <sup>2.60b</sup> A | 8.15 ± 0.08**                 | 69.53 ± 2.41                    |
|               | L199 <sup>2.71b</sup> A | 9.69 ± 0.08*                  | 84.84 ± 20.60                   |
| TM3           | F222 <sup>3.36b</sup> A | 9.44 ± 0.19*                  | 71.48 ± 8.99                    |
|               | Q223 <sup>3.37b</sup> A | 9.13 ± 0.12**                 | 108.32 ± 15.10                  |
|               | V226 <sup>3.40b</sup> A | 10.01 ± 0.10                  | 69.59 ± 10.93                   |
|               | F230 <sup>3.44b</sup> A | 10.47 ± 0.19                  | 70.89 ± 15.09                   |
| ECL2          | I289 <sup>ECL2</sup> A  | 9.90 ± 0.05*                  | 102.97 ± 18.88                  |
| TM5           | W294 <sup>5.36b</sup> A | 9.35 ± 0.13*                  | 116.54 ± 3.28                   |
|               | I301 <sup>5.43b</sup> A | 10.22 ± 0.04                  | 73.01 ± 10.76                   |
| TM7           | M370 <sup>7.39b</sup> A | 10.05 ± 0.16                  | 118.41 ± 6.42                   |
|               | L374 <sup>7.43b</sup> A | 10.16 ± 0.14                  | 108.82 ± 12.08                  |

**Supplementary Table 5. List of primer sequences used in this study**

| Oligonucleotide name        | Oligonucleotide sequence (5'→3')      | Cloning method            | Product                       |
|-----------------------------|---------------------------------------|---------------------------|-------------------------------|
| VIP1R(31-437) Forward       | CACCATCACCATCACGCCAGGCTGCAGGAGGAGTG   | Homologous recombination  | pfastbac-VIP1R(31-437)-LgBiT  |
| VIP1R(31-437) Reverse       | TTCGAGTGTGAAGACCAGCATGGAACCTGCGTGC    |                           |                               |
| Linear pfastbac Forward     | GTCTTCACACTCGAAGATTTTCGTTG            |                           |                               |
| Linear pfastbac Reverse     | GTGATGGTGATGGTGATGGTGATG              |                           |                               |
| VIP1R Forward               | GGTGTCCACTCCGAGGCCAGGCTGCAGGAGGAGTGTG | Homologous recombination  | pcDNA6.0-VIP1R mutants        |
| VIP1R(31-437)-LgBiT Reverse | GAAGGGCCCTCTAGATTAGCTGTTGATGGTTACTCGG |                           |                               |
| VIP1R(31-437) Reverse       | GGGCCCTCTAGATTACAGCATGGAACCTG         |                           |                               |
| VIP1R (31-457) Reverse      | GGGCCCTCTAGATTAGACCAGGGAGACTTCGGC     |                           |                               |
| Linear pcDNA Forward        | TAATCTAGAGGGCCCTTC                    |                           |                               |
| Linear pcDNA Reverse        | CTCGGAGTGGACACCTGTG                   | Site-directed mutagenesis | pcDNA6.0-VIP1R(31-457, Q135A) |
| Q135A Forward               | GAGCAGGCCACCATGTTCTACGGTTC            |                           |                               |
| Q135A Reverse               | CATGGTGGCCTGCTCATCCAAACTC             |                           | pcDNA6.0-VIP1R(31-457, T136A) |
| T136A Forward               | CAGCAGGCCATGTTCTACGGTTC               |                           |                               |
| T136A Reverse               | GAACATGGCCTGCTGCTCATCCAAAC            |                           | pcDNA6.0-VIP1R(31-457, Y139A) |
| Y139A Forward               | ATGTTCCCGGTTCTGTGAAGACC               |                           |                               |
| Y139A Reverse               | AGAACCGGCGAACATGGTCTGCTGC             |                           | pcDNA6.0-VIP1R(31-457, V142A) |
| V142A Forward               | GGTTCTGCCAAGACCGGTACACC               |                           |                               |
| V142A Reverse               | GGTCTTGCGAGAACCGTAGAACATGG            |                           | pcDNA6.0-VIP1R(31-457, Y146A) |
| Y146A Forward               | ACCGGCGCCACCATCGGCTACGGC              |                           |                               |
| Y146A Reverse               | GATGGTGGCGCCGGTCTCACAGAAC             |                           | pcDNA6.0-VIP1R(31-457, R188A) |
| R188A Forward               | TTGGCCGCTTCGACAGCGGGGAG               |                           |                               |
| R188A Reverse               | GTCGAAGGCGGCCAAGTCTTTGATG             |                           | pcDNA6.0-VIP1R(31-457, L199A) |
| L199A Forward               | GTCTTTGCCCAATATTGTGTCATGGC            |                           |                               |
| L199A Reverse               | ATATTGGGCAAAGACCATGGCTGC              |                           | pcDNA6.0-VIP1R(31-457, F222A) |
| F222A Forward               | TTTTTCGCCTATTGTGTCATGGCTAAC           |                           |                               |
| F222A Reverse               | ACAATAGGCGAAAAAGACCATGGCTG            |                           | pcDNA6.0-VIP1R(31-457, Q223A) |
| Q223A Forward               | TATTGTGCCATGGCTAACTTCTTC              |                           |                               |
| Q223A Reverse               | AGCCATGGCACAATATTGGA AAAAAGAC         |                           | pcDNA6.0-VIP1R(31-457, V226A) |
| V226A Forward               | GCTAACGCCTTCTGGCTGCTGGTGG             |                           |                               |
| V226A Reverse               | CCAGAAGGCGTTAGCCATGACACAATATTGG       |                           | pcDNA6.0-VIP1R(31-457, F230A) |
| F230A Forward               | GACACCGCCAACTCCTCACTGTGGTG            |                           |                               |
| F230A Reverse               | GGAGTTGGCGGTGTCCCAGCACCC              |                           | pcDNA6.0-VIP1R(31-457, I289A) |
| I289A Forward               | TCACTGGCCTGGATCATAAAGGGCCCC           |                           |                               |
| I289A Reverse               | GATCCAGGCCAGTGAGGAGTTGATG             |                           | pcDNA6.0-VIP1R(31-457, W294A) |
| W294A Forward               | GGCCCCGCCCTCACCTCCATCTTGG             |                           |                               |
| W294A Reverse               | GGTGAGGGCGGGGCCCTTTATGATCC            |                           | pcDNA6.0-VIP1R(31-457, I301A) |
| I301A Forward               | GTGAAGGCCGTCTTTGAGCTCGTGC             |                           |                               |
| I301A Reverse               | AAAGACGGCCTTCACTCAGGCTTAAAATTG        |                           | pcDNA6.0-VIP1R(31-457, M370A) |
| M370A Forward               | TTTGAGGCCGTCGTGGGGTCTTTCCAG           |                           |                               |
| M370A Reverse               | CACGACGGCCTCAAAGACCATCTTC             |                           | pcDNA6.0-VIP1R(31-457, L374A) |
| L374A Forward               | ATCCTGGCCGCTGCCGTGTCTTCATC            |                           |                               |
| L374A Reverse               | GGCAGCGGCCAGGATGAAGGATATGAAGAGGTG     |                           |                               |
